# Supplementary material
Source: Springer Nature journal article supplement (https://www.springermedizin.de/resource/supplementary/12958_2009_548_MOESM4_ESM.pdf/9568278)

**A.**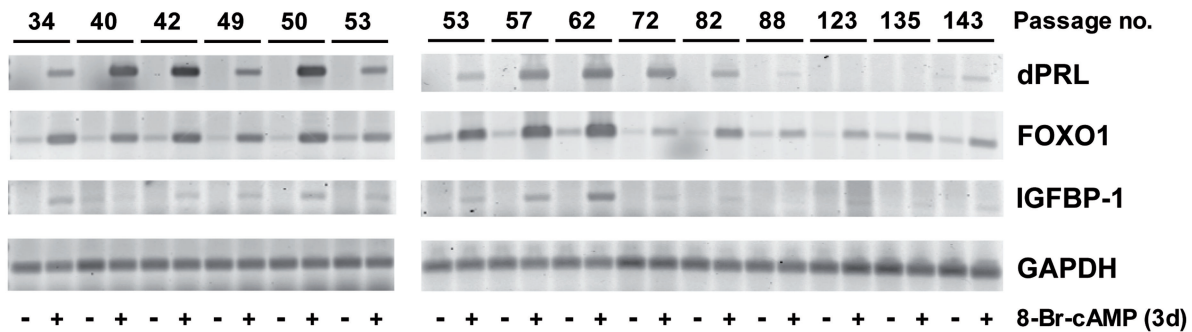**B.**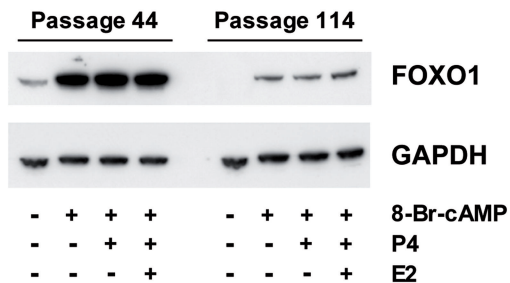**C.**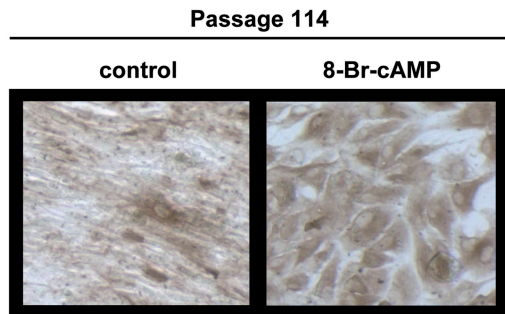

Supplement: MOESM4 [file 9568278]
